# Supplementary material
Source: Springer Nature journal article supplement (https://www.springermedizin.de/resource/supplementary/12885_2013_4651_MOESM7_ESM.pdf/9466806)

A.

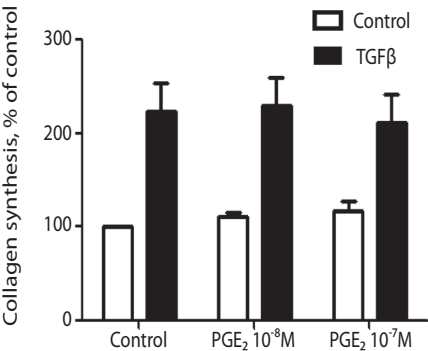

B.

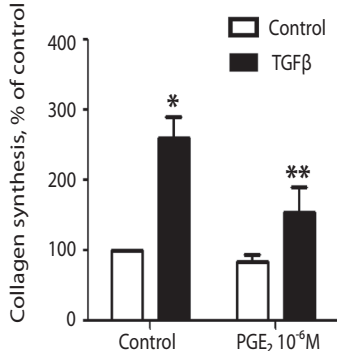

C.

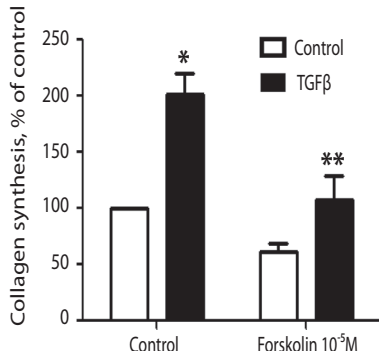

D.

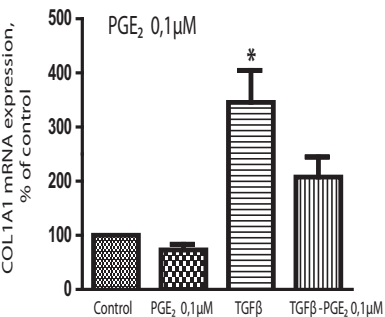

E.

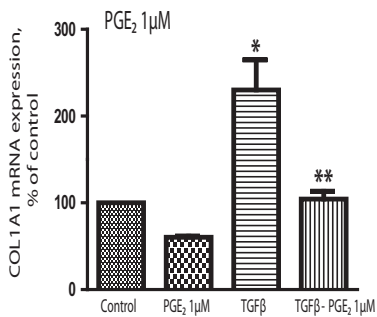

F.

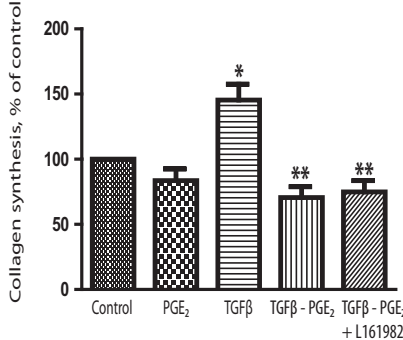

Supplement: MOESM7 [file 9466806]
